# Supplementary material for: Cross-talk between GABAergic postsynapse and microglia regulate synapse loss after brain ischemia
Source: PubMed Central journal article supplement — Sci Adv. 2022 Mar 4;8(9):eabj0112. doi: 10.1126/sciadv.abj0112 (PMC8896802; doi:10.1126/sciadv.abj0112), 2022-03-04
Supplement: sciadv.abj0112_sm.pdf [file sciadv.abj0112_sm.pdf]

Supplementary Materials for  
**Cross-talk between GABAergic postsynapse and microglia regulate synapse loss after brain ischemia**

Teresa Cramer, Raminder Gill, Zahra S. Thirouin, Markus Vaas, Suchita Sampath, Fanny Martineau, Sara B. Noya, Patrizia Panzanelli, Tania J. J. Sudharshan, David Colameo, Philip K.-Y. Chang, Pei You Wu, Roy Shi, Philip A. Barker, Steven A. Brown, Rosa C. Paolicelli, Jan Klohs, Rebecca Anne McKinney\*, Shiva K. Tyagarajan\*

\*Corresponding author. Email: tyagarajan@pharma.uzh.ch (S.K.T.); anne.mckinney@mcgill.ca (R.A.M.)

Published 4 March 2022, *Sci. Adv.* **8**, eabj0112 (2022)  
DOI: 10.1126/sciadv.abj0112

**This PDF file includes:**

Figs. S1 to S6

**Fig. S1.**

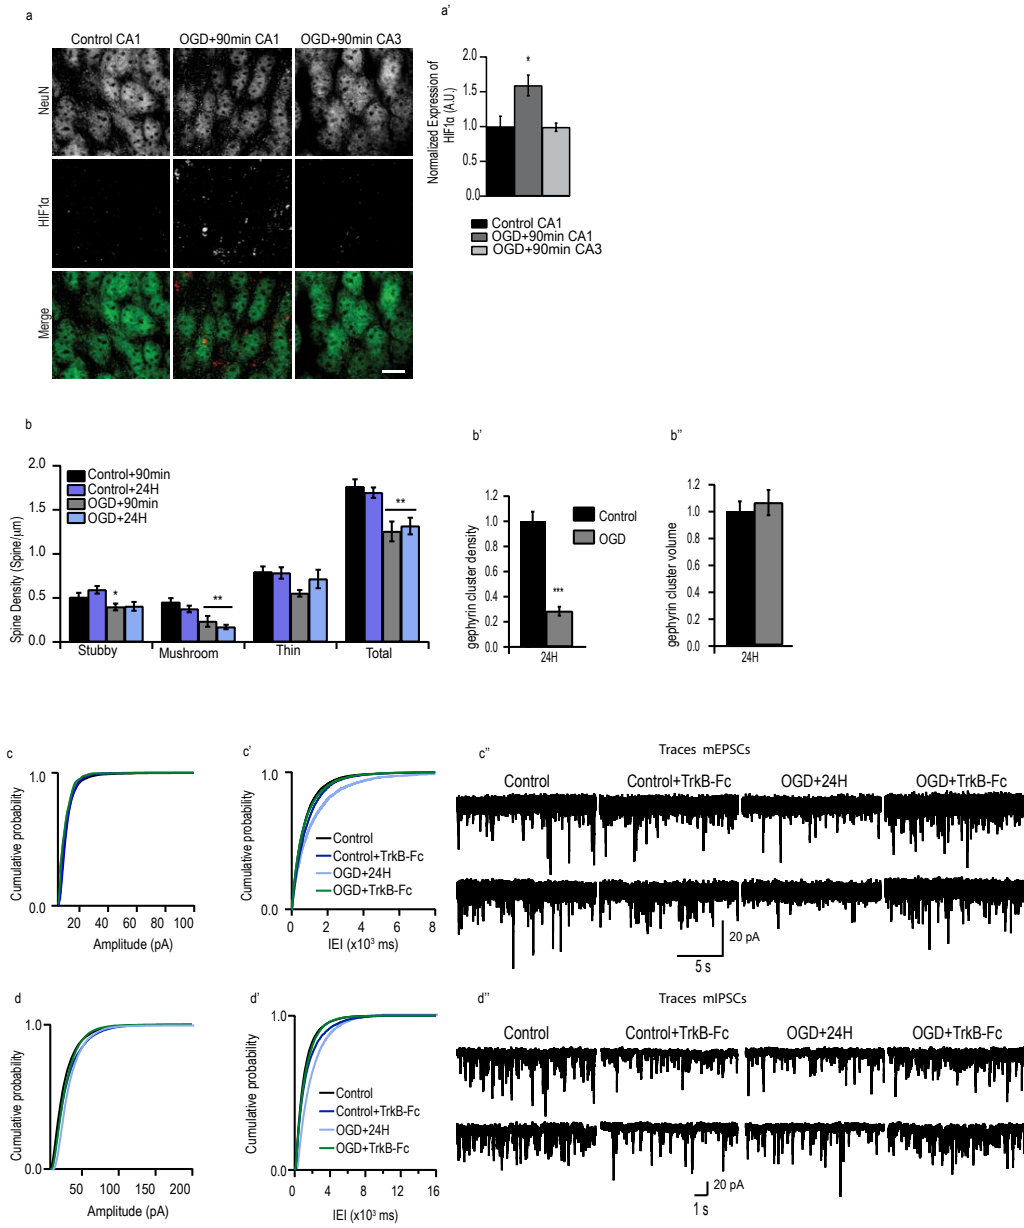

**OGD causes glutamatergic and GABAergic synapse loss via BDNF signaling.** **(a)** HIF1 $\alpha$  expression in CA1 pyramidal neurons at 90min after OGD in hippocampal slice culture. **(a')** Quantification of HIF1 $\alpha$  expression in CA1 pyramidal neurons. **(b)** Quantification of dendritic spines at 90 min and 24 h after OGD. The spines were categorized into stubby, mushroom and long thin subtypes (\* $p < 0.05$  and \*\* $p < 0.01$ , two-tailed independent Student's t-test). Total spine density (spines/ $\mu\text{m}$  of dendrite). **(b')** Quantification of gephyrin cluster density 24 h after OGD (consisting of five 512x512 pixel z-planes each; \*\*\* $p < 0.0001$ , two-tailed independent Student's t-test). **(b'')** Quantification of the total gephyrin cluster volume at 24 h after OGD (\*\*\* $p < 0.0001$ , two-tailed independent Student's t-test). **(c)** Cumulative probability histogram of mEPSC amplitude in TrkB-Fc treated neurons at 24 h post OGD ( $p < 0.05$  Kolmogorov-Smirnov test). **(c')** Cumulative probability histogram of mEPSC IEIs ( $p < 0.05$ , Kolmogorov-Smirnov test). **(c'')** Example traces of AMPA-mediated mEPSC recordings after TrkB-Fc treatment and OGD. **(d)** Cumulative probability histogram of mIPSC amplitudes in TrkB-Fc treated neurons at 24 h post OGD ( $p < 0.05$ , Kolmogorov-Smirnov test). **(d')** Cumulative probability histogram of mIPSC IEIs ( $p < 0.05$ , Kolmogorov-Smirnov test). **(d'')** Example trace of mIPSCs after TrkB-Fc treatment and OGD .

**Fig. S2**

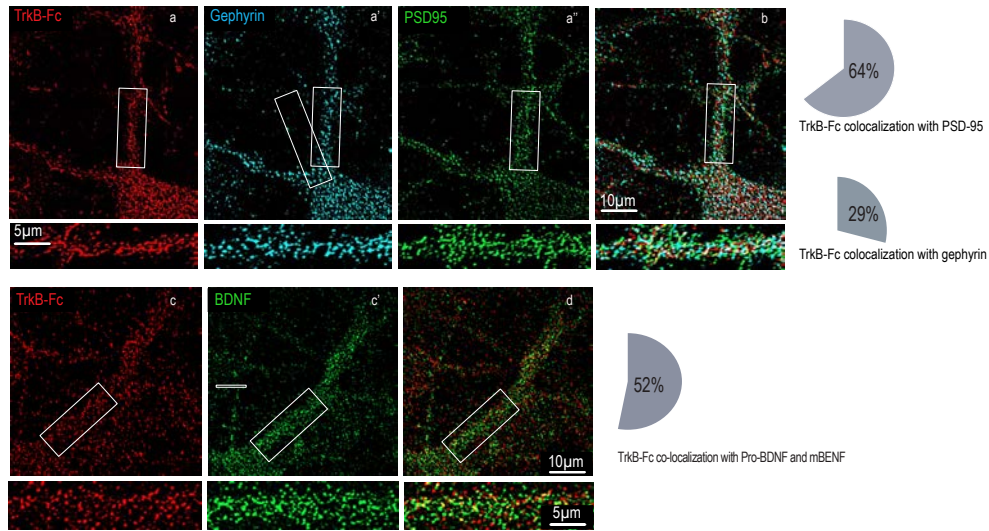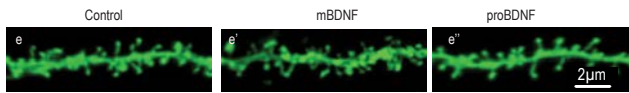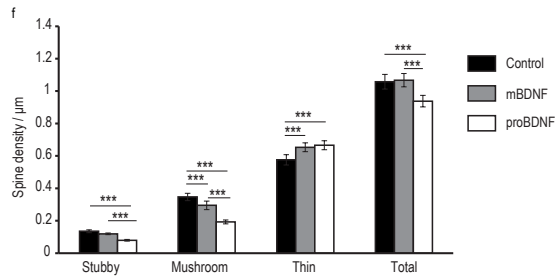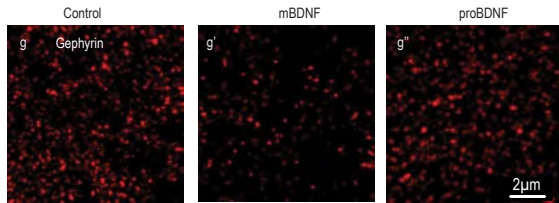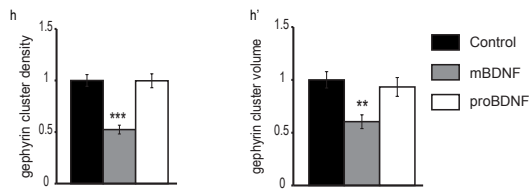

Cramer et al., Supplementary Figure 2

**proBDNF and mBDNF act on glutamatergic and GABAergic synapses respectively. (a-a'')** Representative image of primary hippocampal neuron (15DIV) treated with TrkB-Fc and co-stained for gephyrin and PSD-95. **(b)** Composite image showing colocalization of TrkB-Fc-

gephyrin or TrkB-Fc- PSD-95. High magnification dendrite segment is shown in the panel below. Quantification shows 64% colocalization of PSD-95 with TrkB-Fc and 29% colocalization with gephyrin (n=15). **(c-c')** Representative image of primary hippocampal neuron treated with TrkB-Fc and co-stained for BDNF. **(d)** Composite image showing colocalization of TrkB-Fc and BDNF. Quantification shows 52% colocalization of PSD-95 with TrkB-Fc and BDNF (n=15). **(e-e')** Representative image of a dendrite segment of CA1 area from hippocampal slice culture treated with proBDNF or mBDNF. **(f)** Quantification of different spine subtypes or total spines on pyramidal neuron after treatment with proBDNF or mBDNF. \* $p < 0.05$ , \*\* $p < 0.001$ , \*\*\* $p < 0.0001$ , Two-way ANOVA with Bonferroni multiple comparison test (n=19). **(g-g')** Representative image of CA1 *Stratum Radiatum* gephyrin staining from hippocampal slice culture treated with proBDNF or mBDNF. **(h)** Quantification for gephyrin puncta density /  $\mu\text{m}^2$  after proBDNF or mBDNF treatment for 90min. **(i)** Quantification for gephyrin puncta volume /  $\mu\text{m}^3$  after proBDNF or mBDNF treatment for 90min. \*\*\* $p < 0.001$ , One-way ANOVA followed by Bonferroni multiple comparison test (n=12). Data shown as mean  $\pm$  SEM.

**Fig. S3**

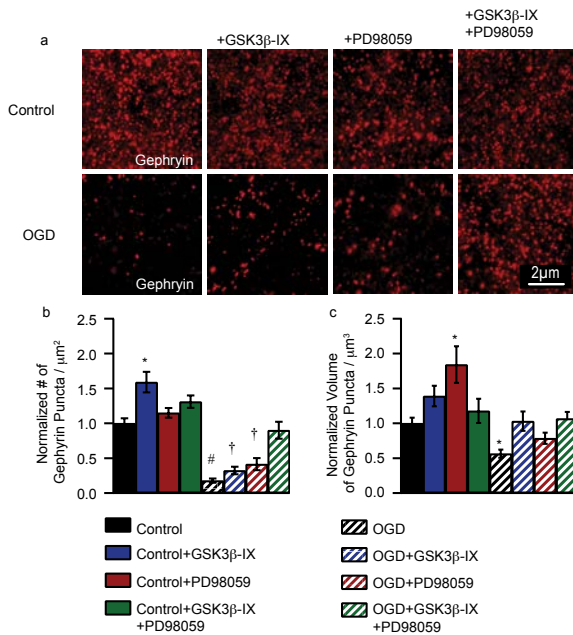

Cramer et al., Supplementary Figure 3

**ERK1/2 and GSK3 $\beta$  signaling pathways are activated after OGD to downregulate gephyrin clustering.** **(a)** Representative image showing gephyrin clustering in CA1 *Stratum Radiatum* area of hippocampus in control or OGD treated slice cultures treated with GSK3 $\beta$  inhibitor GSK3 $\beta$ -IX, or MEK inhibitor PD98059 or GSK3 $\beta$ -IX + PD98059. **(b)** Quantification of gephyrin puncta density /  $\mu\text{m}^2$ . **(c)** Quantification of gephyrin puncta volume /  $\mu\text{m}^2$ . (n=4).

**Fig. S4**

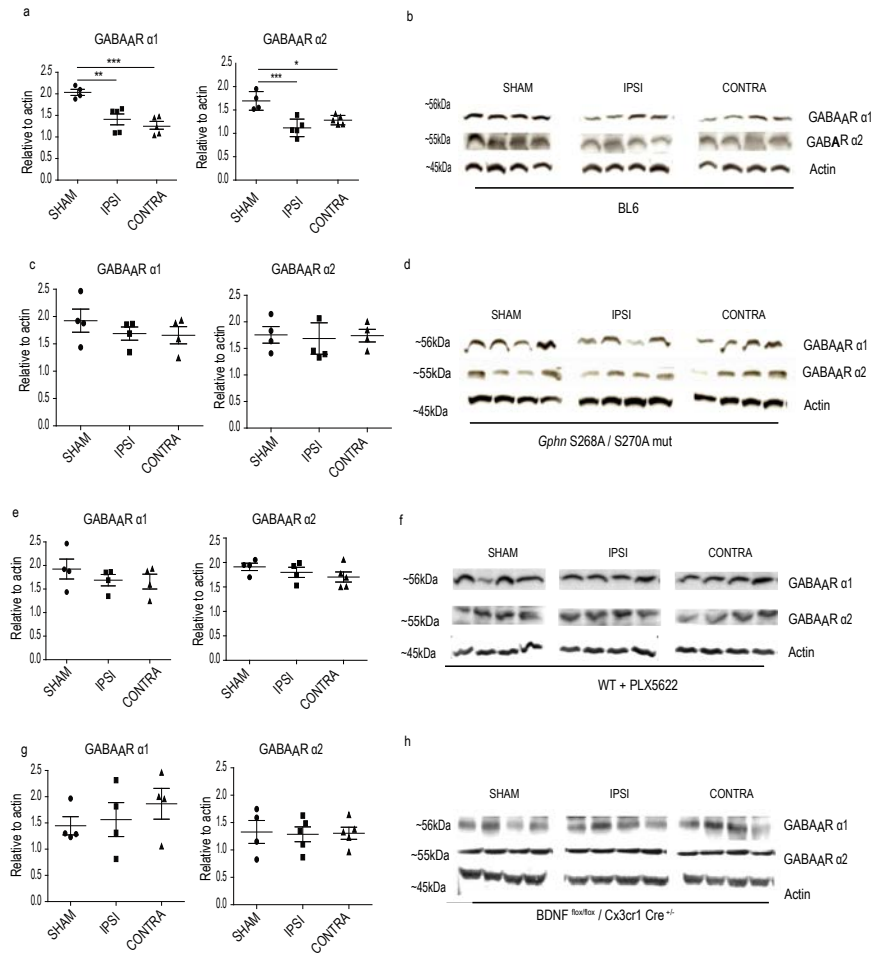

Cramer et al., Supplementary Figure 4

***α1* and *α2* GABA<sub>A</sub>R expression levels in different mouse lines after OGD. (a-b)** WB analysis and quantification for *α1* and *α2* GABA<sub>A</sub>R in BL6 WT mice at 24 h after MCAO. **(c-d)** WB analysis and quantification for *α1* and *α2* GABA<sub>A</sub>R in *Gphn*S268A/S270A mutant mice at 24 h after MCAO. **(e-f)** WB analysis and quantification for *α1* and *α2* GABA<sub>A</sub>R in BL6 WT mice treated with PLX5622 at 24 h after MCAO. **(g-h)** WB analysis and quantification for *α1* and *α2* GABA<sub>A</sub>R in *BDNF*<sup>flox/flox</sup> / *Cx3cr1*<sup>CreERT2+/-</sup> mice at 24 h after MCAO. Quantification expressed as mean ± s.d. (N=4); \*P<0.05; \*\*P<0.01; \*\*\*P<=0.001 (One-way ANOVA, Bonferroni multiple comparison test).

**Fig. S5**

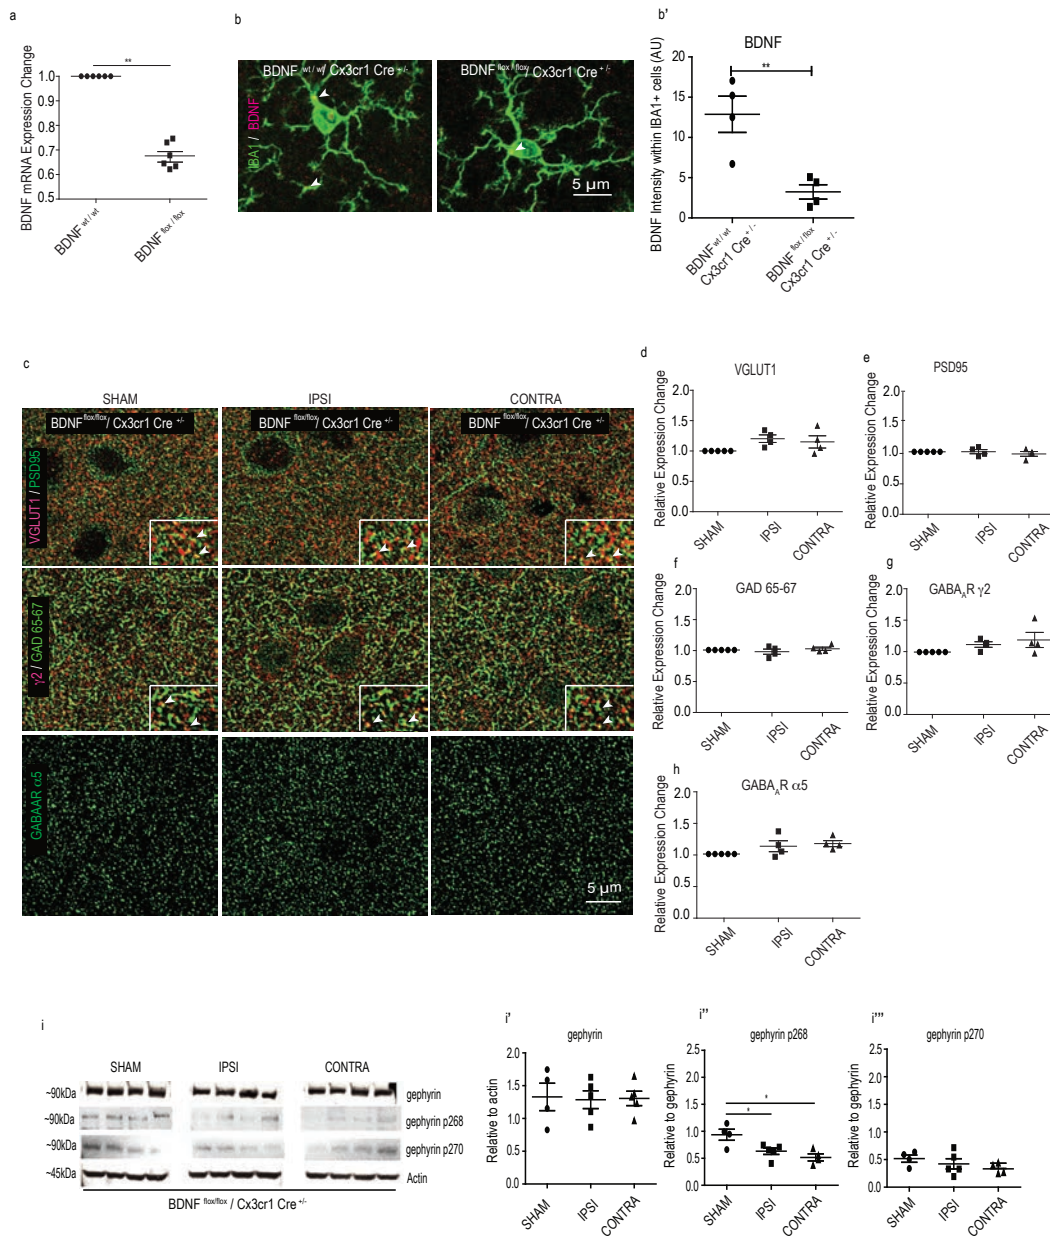

Cramer et al., Supplementary Figure 5

**Bdnf deletion from microglia stabilize synapses after MCAO.** (a) Quantitative RT-PCR for *Bdnf* mRNA changes in cultured microglia from BDNF<sup>wt/wt</sup> / CX3CR1<sup>CreERT2+/-</sup> and BDNF<sup>lox/lox</sup> / CX3CR1<sup>CreERT2+/-</sup> mice. (b) Example images of BDNF protein expression within microglia from BDNF<sup>wt/wt</sup> / CX3CR1<sup>CreERT2+/-</sup> and BDNF<sup>lox/lox</sup> / CX3CR1<sup>CreERT2+/-</sup> mice. (b') Quantification of BDNF intensity within IBA1 cells in BDNF<sup>wt/wt</sup> / CX3CR1<sup>CreERT2+/-</sup> and BDNF<sup>lox/lox</sup> / CX3CR1<sup>CreERT2+/-</sup> mice. (c) Example images from BDNF<sup>lox/lox</sup> / CX3CR1<sup>CreERT2+/-</sup> sham and MCAO mice showing VGLUT1/PSD95 (column 1), GABA<sub>A</sub>R γ2/ GAD65-67 (column 2), GABA<sub>A</sub>R α5 (column 3). (d-e) Quantification of VGLUT1, PSD95 expression change in MCAO

animals relative to sham. **(f-h)** Quantification of GAD65-67, GABA<sub>A</sub>R  $\gamma$ 2 and GABA<sub>A</sub>R  $\alpha$ 5 expression changes in MCAO animals compared to sham. **(i)** WB analysis for total gephyrin, phospho-gephyrin S268 and S270 in BDNF<sup>fl/fl</sup> / CX3CR1<sup>CreERT2</sup><sup>+/-</sup> sham and MCAO mice. **(i'-i''')** Quantification of total gephyrin, phospho gephyrin S268 and S270. Morphology analysis shown as mean  $\pm$  s.d. (n=4 animals); P=0.55 (Two-way ANOVA, Bonferroni multiple comparison test; F=(2,9)=8.7).

**Fig. S6**

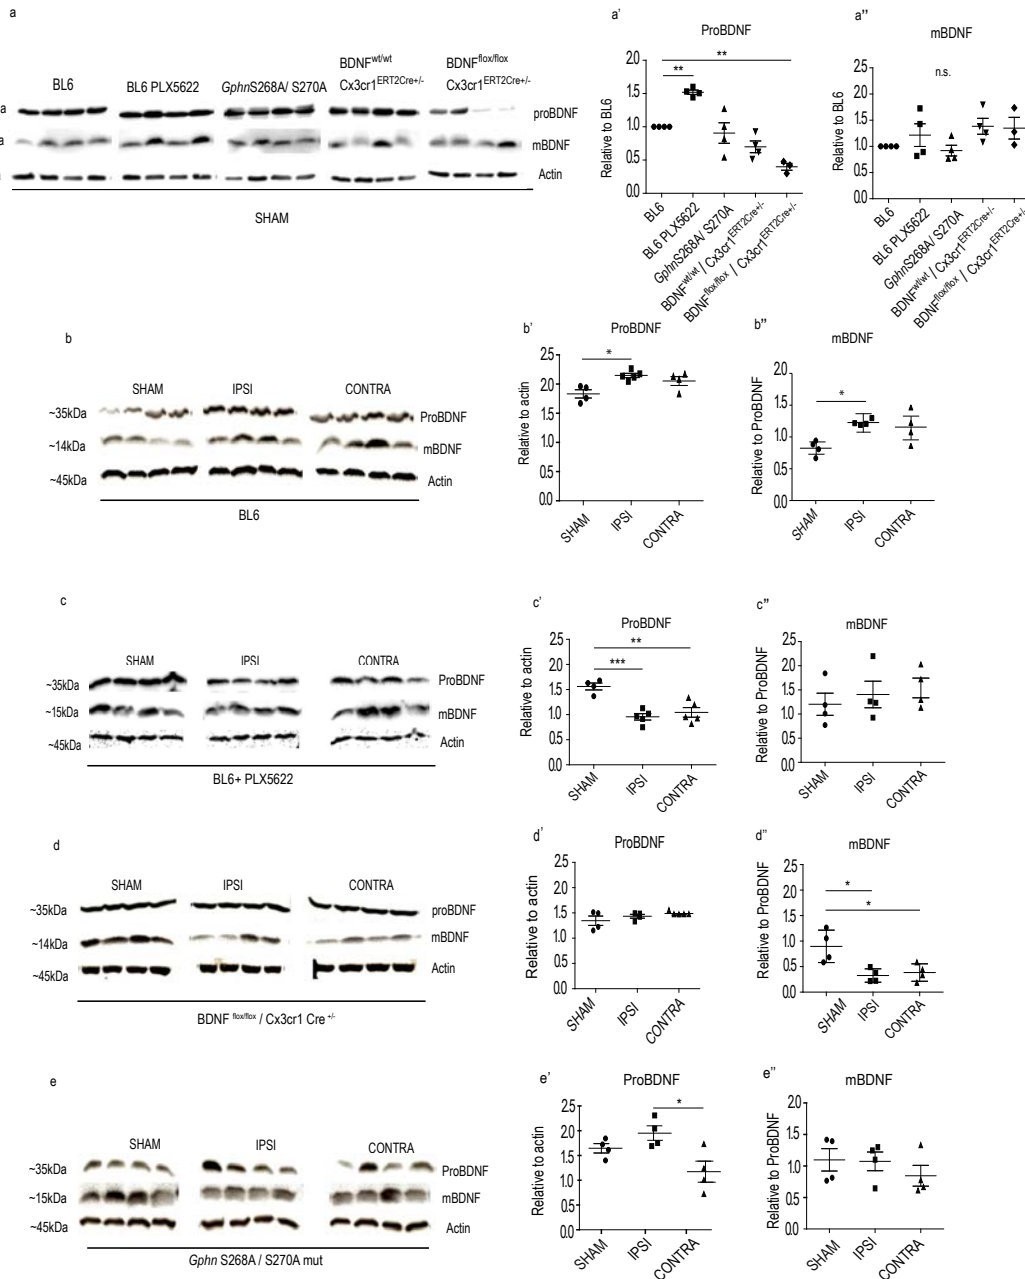



**BDNF expression difference between mouse lines at baseline and after MCAO. (a-a'')** WB analysis for proBDNF and mBDNF from parietal cortex L2/3 in BL6 WT mice, BL6 WT mice treated with PLX5622, *Gphn*S268A/S270A mutant mice, BDNF<sup>wt/wt</sup> / Cx3cr1<sup>ERT2Cre+/-</sup> and BDNF<sup>flox/flox</sup> / Cx3cr1<sup>ERT2Cre+/-</sup>. **(b)** WB analysis of cortex L2/3 in WT mice for changes in proBDNF and mBDNF levels 24 h following MCAO. **(b'-b'')** Quantification for proBDNF (One-way ANOVA, Bonferroni multiple comparison test; F(2,10)=7.3; P=0.01) and mBDNF (One-way ANOVA, Bonferroni multiple comparison test; F(2,9)=6.8; P=0.015) from cortex of ipsi- and corresponding contra-lateral hemispheres in WT mice 24 h post MCAO. **(c)** WB analysis of cortex L2/3 in BL6 WT mice treated with PLX5622 for changes in proBDNF and mBDNF levels 24 h post MCAO. **(c'-c'')** Quantification for proBDNF (One-way ANOVA, Brown-Forsythe test; F(2,11)=15.8; P=0.0006) and mBDNF from ipsi- and corresponding contra-lateral hemispheres in BL6 WT mice treated with PLX5622. **(d)** WB analysis of cortex L2/3 in BDNF<sup>flox/flox</sup> / CX3CR1<sup>CreERT2+/-</sup> for proBDNF and mBDNF levels 24 h following MCAO. **(d'-d'')** Quantification for proBDNF and mBDNF (One-way ANOVA, Brown-Forsythe test; F(2,9)=8.044; P=0.0099) from ipsi- and corresponding contra-lateral hemispheres in BDNF<sup>flox/flox</sup> / CX3CR1<sup>CreERT2+/-</sup> mice. **(e)** WB analysis of cortex L2/3 in *Gphn*S268A/S270A mutant mice for proBDNF (One-way ANOVA, Brown-Forsythe test; F(2,9)=6.1; P=0.02) and mBDNF levels 24 h following MCAO. **(e'-e'')** Quantification for proBDNF and mBDNF from ipsi- and corresponding contra-lateral hemispheres in *Gphn*S268A/S270A mutant mice.
